# Supplementary material for: A novel hypoglycemic agent: polysaccharides from laver (Porphyra spp.)
Source: Royal Society of Chemistry journal article supplement (doi:10.1039/d0fo01195a), 2020-01-01
Supplement: d0fo01195a1.pdf [file d0fo01195a1.pdf]

1     **Supplementary data for “The novel hypoglycemic agent:**  
2             **polysaccharides from Laver (*Porphyra* spp)”**

3

4     **Supplementary material and methods**

5     **The optimization of reaction conditions**

6     When H<sub>2</sub>O<sub>2</sub> was used as oxidant to degrade crude polysaccharides, the temperature and  
7     heating time were optimized. To investigate the influence of temperature, the reaction  
8     systems were incubated under various temperatures (25—95 °C). Moreover, the impact  
9     of heating time (0—4 h) was investigated under 85 °C.

10

## 11 Supplementary Figures

### 12 Supplementary figure 1

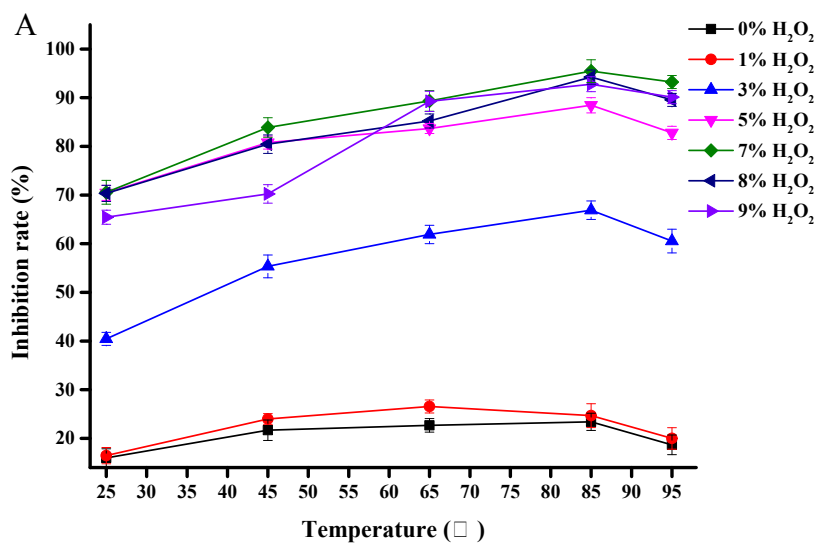

13

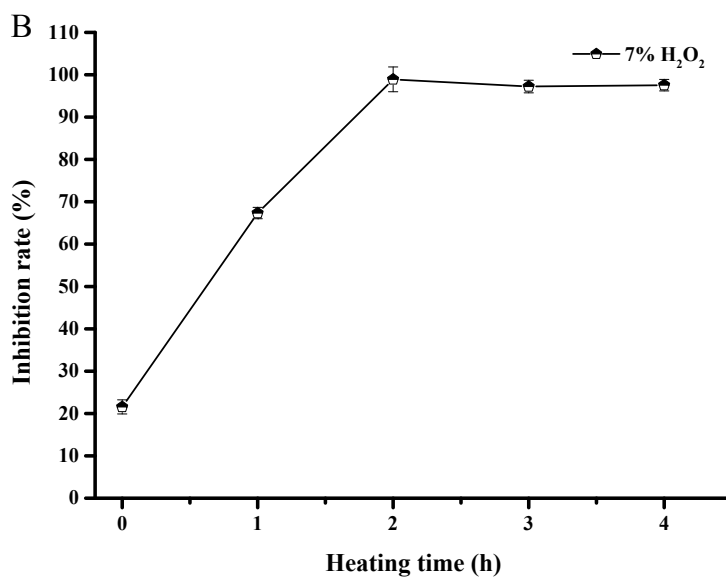

14

15 **The optimization of reaction conditions when H<sub>2</sub>O<sub>2</sub> was used as oxidant to degrade**

16 **crude polysaccharides.** (A) The optimization of reaction temperature for H<sub>2</sub>O<sub>2</sub> to

17 degrade crude polysaccharides. The various concentrations of H<sub>2</sub>O<sub>2</sub> (0—9%) were used

18 as oxidant and the reaction systems were heated for 3 h. (B) The optimization of

19 reaction time when 7% of H<sub>2</sub>O<sub>2</sub> was used to degrade crude polysaccharides. The

20 reaction system was heated under 85 °C.
